# Supplementary material for: Population Structure of Listeria monocytogenes in Emilia-Romagna (Italy) and Implications on Whole Genome Sequencing Surveillance of Listeriosis
Source: Front Public Health. 2020 Sep 18;8:519293. doi: 10.3389/fpubh.2020.519293 (PMC7531028; doi:10.3389/fpubh.2020.519293)
Supplement: Supplementary file 2 [file Table_1.XLSX]

## Sheet: TabS1
Type	Accession	Unique	Name	Source	Isolation Material	Date of isolation (dd/mm/yy)	Year of birth	Lineage	Clonal Complex	Sequence Type	Notes
	ERS3718836	(SAMEA5930354)	2018-180649-001-01	Human	blood	2018-06-25	1941	II	CC121	ST121
Sample	ERS3737790	(SAMEA5949303)	2017-049591-055-01	Human	blood	2016-07-10	1941	II	CC9	ST9
Sample	ERS3737791	(SAMEA5949304)	2017-049591-060-01	Human	blood	2016-06-18	1946	II	CC9	ST9
Sample	ERS3737792	(SAMEA5949305)	2016-051842-078-01	Human	blood	2014-03-06	1921	II	CC9	ST9
Sample	ERS3737793	(SAMEA5949306)	2016-051842-100-01	Human	blood	2015-06-18	1944	II	CC9	ST9
Sample	ERS3737794	(SAMEA5949307)	2017-156934-001-01	Human	blood	2017-01-10	1943	II	CC9	ST9
Sample	ERS3737795	(SAMEA5949308)	2017-325981-018-01	Human	blood	2017-09-25	1938	II	CC9	ST9
Sample	ERS3737796	(SAMEA5949309)	2017-325981-022-01	Human	blood	2017-09-22	1952	II	CC9	ST9
Sample	ERS3737797	(SAMEA5949310)	2017-049591-029-01	Human	blood	2015-08-10	1942	II	CC9	ST9
Sample	ERS3737798	(SAMEA5949311)	2017-049591-069-01	Human	blood	2016-03-18	1973	II	CC9	ST9
Sample	ERS3737799	(SAMEA5949312)	2016-051842-072-01	Human	blood	2014-01-08	1932	II	CC9	ST9
Sample	ERS3737800	(SAMEA5949313)	2018-077363-001-01	Human	blood	2018-03-15	1953	II	ST36	ST36
Sample	ERS3737801	(SAMEA5949314)	2017-247266-001-01	Human	blood	2017-08-26	-	II	CC8	ST8
Sample	ERS3737802	(SAMEA5949315)	2017-049591-026-01	Human	blood	2015-08-11	1924	II	CC8	ST8
Sample	ERS3737803	(SAMEA5949316)	2017-325981-001-01	Human	blood	2017-03-31	1942	II	CC8	ST8
Sample	ERS3737804	(SAMEA5949317)	2018-401825-014-01	Human	CSF	2018-11-22	1944	II	CC8	ST8
Sample	ERS3737805	(SAMEA5949318)	2016-051842-047-01	Human	blood	2014-11-16	1946	II	CC8	ST8
Sample	ERS3737806	(SAMEA5949319)	2017-049591-028-01	Human	blood	2015-10-06	1937	II	CC8	ST8
Sample	ERS3737807	(SAMEA5949320)	2017-049591-044-01	Human	blood	2016-03-15	1944	II	CC8	ST8
Sample	ERS3737808	(SAMEA5949321)	2017-049591-035-01	Human	blood	2015-02-03	1934	II	CC8	ST8
Sample	ERS3737809	(SAMEA5949322)	2016-051842-086-01	Human	blood	2014-12-29	1967	II	CC8	ST8
Sample	ERS3737810	(SAMEA5949323)	2017-049591-022-01	Human	blood	2015-07-31	1949	II	CC8	ST8
Sample	ERS3737811	(SAMEA5949324)	2016-051842-059-01	Human	blood	2014-08-19	1925	II	CC8	ST8
Sample	ERS3737812	(SAMEA5949325)	2016-051842-067-01	Human	blood	2014-05-16	1947	II	CC8	ST8
Sample	ERS3737813	(SAMEA5949326)	2016-051842-085-01	Human	blood	2013-12-07	1932	II	CC8	ST8
Sample	ERS3737814	(SAMEA5949327)	2018-146296-009-01	Human	blood	2018-03-01	1941	II	CC8	ST8
Sample	ERS3737815	(SAMEA5949328)	2018-065711-001-01	Human	blood	2018-02-26	1941	II	CC8	ST8
Sample	ERS3737816	(SAMEA5949329)	2016-051842-082-01	Human	blood	2013-11-18	1934	II	CC8	ST8
Sample	ERS3737817	(SAMEA5949330)	2018-401825-002-01	Human	blood	2018-06-01	1937	II	CC8	ST8
Sample	ERS3737818	(SAMEA5949331)	2017-049591-043-01	Human	blood	2016-01-31	1975	II	CC8	ST8
Sample	ERS3737819	(SAMEA5949332)	2017-049591-048-01	Human	blood	2016-09-24	1930	II	CC8	ST8
Sample	ERS3737820	(SAMEA5949333)	2018-401825-012-01	Human	blood	2018-09-09	1946	II	CC8	ST8
Sample	ERS3737821	(SAMEA5949334)	2017-280071-001-01	Human	CSF	2017-10-12	1968	II	CC8	ST8
Sample	ERS3737822	(SAMEA5949335)	2016-051842-017-01	Human	blood	2013-08-06	1923	II	CC8	ST8
Sample	ERS3737823	(SAMEA5949336)	2017-353356-001-01	Human	blood	2017-12-06	1940	II	ST570	ST570
Sample	ERS3737824	(SAMEA5949337)	2016-051842-039-01	Human	blood	2013-06-26	1947	II	CC29	ST29
Sample	ERS3737825	(SAMEA5949338)	2017-049591-014-01	Human	blood	2012-09-07	1950	II	CC29	ST29
Sample	ERS3737826	(SAMEA5949339)	2017-049591-008-01	Human	CSF	2012-06-24	1939	II	CC29	ST29
Sample	ERS3737827	(SAMEA5949340)	2016-051842-076-01	Human	blood	2014-05-07	1925	II	CC29	ST29
Sample	ERS3737828	(SAMEA5949341)	2016-051842-005-01	Human	blood	2013-01-30	1923	II	CC29	ST29
Sample	ERS3737829	(SAMEA5949342)	2016-051842-064-01	Human	blood	2014-06-18	1952	II	CC29	ST29
Sample	ERS3737830	(SAMEA5949343)	2016-051842-029-01	Human	blood	2013-03-07	1919	II	CC29	ST29
Sample	ERS3737831	(SAMEA5949344)	2016-051842-073-01	Human	blood	2014-04-10	1934	II	CC29	ST29
Sample	ERS3737832	(SAMEA5949345)	2016-051842-058-01	Human	blood	2014-08-11	1986	II	CC29	ST29
Sample	ERS3737833	(SAMEA5949346)	2016-051842-061-01	Human	blood	2014-08-20	2014	II	CC29	ST29
Sample	ERS3737834	(SAMEA5949347)	2016-051842-063-01	Human	blood	2014-06-18	1929	II	CC29	ST29
Sample	ERS3737835	(SAMEA5949348)	2016-051842-081-01	Human	blood	2014-03-03	1953	II	CC29	ST29
Sample	ERS3737836	(SAMEA5949349)	2016-051842-065-01	Human	blood	2014-07-22	1929	II	CC29	ST29
Sample	ERS3737837	(SAMEA5949350)	2016-051842-131-01	Human	blood	2015-01-14	1944	II	CC29	ST29
Sample	ERS3737838	(SAMEA5949351)	2018-146296-003-01	Human	blood	2018-03-29	1979	II	CC29	ST29
Sample	ERS3737839	(SAMEA5949352)	2016-051842-119-01	Human	blood	2015-02-12	1945	II	CC29	ST29
Sample	ERS3737840	(SAMEA5949353)	2016-051842-068-01	Human	blood	2014-10-29	1939	II	CC37	ST37
Sample	ERS3737841	(SAMEA5949354)	2017-049591-061-01	Human	blood	2016-11-07	1923	II	CC37	ST37
Sample	ERS3737842	(SAMEA5949355)	2016-051842-109-01	Human	blood	2015-06-16	1932	II	CC415	ST394
Sample	ERS3737843	(SAMEA5949356)	2016-051842-093-01	Human	blood	2015-04-14	1937	II	CC415	ST394
Sample	ERS3737844	(SAMEA5949357)	2016-051842-101-01	Human	blood	2015-06-16	1953	II	CC415	ST394
Sample	ERS3737845	(SAMEA5949358)	2016-051842-104-01	Human	blood	2015-07-02	1940	II	CC415	ST394
Sample	ERS3737846	(SAMEA5949359)	2016-051842-134-01	Human	blood	2015-03-24	1927	II	CC415	ST394
Sample	ERS3737847	(SAMEA5949360)	2016-051842-095-01	Human	blood	2015-04-14	1933	II	CC415	ST394
Sample	ERS3737848	(SAMEA5949361)	2017-049591-018-01	Human	blood	2015-07-05	1937	II	CC415	ST394
Sample	ERS3737849	(SAMEA5949362)	2016-051842-112-01	Human	blood	2015-07-02	1954	II	CC415	ST394
Sample	ERS3737850	(SAMEA5949363)	2016-051842-096-01	Human	blood	2015-07-02	1927	II	CC415	ST394
Sample	ERS3737851	(SAMEA5949364)	2017-049591-031-01	Human	blood	2015-06-26	1949	II	CC415	ST394
Sample	ERS3737852	(SAMEA5949365)	2016-051842-062-01	Human	blood	2014-07-03	1935	II	CC415	ST394
Sample	ERS3737853	(SAMEA5949366)	2016-051842-070-01	Human	blood	2014-01-24	1951	II	CC19	ST19
Sample	ERS3737854	(SAMEA5949367)	2017-049591-062-01	Human	blood	2013-12-19	1940	II	CC19	ST19
Sample	ERS3737855	(SAMEA5949368)	2017-325981-013-01	Human	blood	2017-07-21	1963	II	CC403	ST403
Sample	ERS3737856	(SAMEA5949369)	2017-325981-021-01	Human	blood	2017-08-30	1957	II	CC155	ST155
Sample	ERS3737857	(SAMEA5949370)	2018-212251-002-01	Human	blood	2018-07-20	1930	I	CC1	ST1
Sample	ERS3737858	(SAMEA5949371)	2016-051842-103-01	Human	blood	2015-07-06	1932	II	CC155	ST155
Sample	ERS3737859	(SAMEA5949372)	2016-051842-033-01	Human	blood	2013-06-19	1937	II	CC155	ST155
Sample	ERS3737860	(SAMEA5949373)	2017-049591-042-01	Human	blood	2016-02-17	1932	II	CC155	ST155
Sample	ERS3737861	(SAMEA5949374)	2016-051842-118-01	Human	blood	2015-01-14	1956	II	CC155	ST155
Sample	ERS3737862	(SAMEA5949375)	2018-146296-001-01	Human	CSF	2018-04-06	1963	II	CC155	ST155
Sample	ERS3737863	(SAMEA5949376)	2016-051842-122-01	Human	blood	2015-02-02	1928	II	CC155	ST155
Sample	ERS3737864	(SAMEA5949377)	2016-051842-021-01	Human	blood	2013-03-07	1948	II	CC155	ST155
Sample	ERS3737865	(SAMEA5949378)	2017-049591-037-01	Human	CSF	2016-01-07	1993	II	CC155	ST155
Sample	ERS3737866	(SAMEA5949379)	2016-051842-011-01	Human	blood	2013-11-20	1931	II	CC155	ST155
Sample	ERS3737867	(SAMEA5949380)	2016-051842-046-01	Human	blood	2014-12-18	1929	II	CC155	ST155
Sample	ERS3737868	(SAMEA5949381)	2017-325981-019-01	Human	blood	2017-08-18	1940	II	CC155	ST155
Sample	ERS3737869	(SAMEA5949382)	2016-051842-015-01	Human	blood	2013-10-09	1940	II	CC155	ST155
Sample	ERS3737870	(SAMEA5949383)	2016-051842-057-01	Human	blood	2014-10-01	1961	II	CC155	ST155
Sample	ERS3737871	(SAMEA5949384)	2017-325981-003-01	Human	blood	2017-04-13	-	II	CC155	ST155
Sample	ERS3737872	(SAMEA5949385)	2016-051842-069-01	Human	blood	2014-10-01	1936	II	CC155	ST155
Sample	ERS3737873	(SAMEA5949386)	2016-051842-115-01	Human	blood	2015-03-23	1945	II	CC207	ST207
Sample	ERS3737874	(SAMEA5949387)	2016-051842-013-01	Human	blood	2013-11-09	1954	II	CC7	ST7
Sample	ERS3737875	(SAMEA5949388)	2016-051842-084-01	Human	blood	2013-10-09	1937	II	CC7	ST7
Sample	ERS3737876	(SAMEA5949389)	2017-049591-064-01	Human	blood	2016-12-10	1938	II	CC7	ST7
Sample	ERS3737877	(SAMEA5949390)	2012-313959-003-01	Human	blood	2012-11-12	1982	II	CC7	ST7
Sample	ERS3737878	(SAMEA5949391)	2017-049591-002-01	Human	blood	2012-11-05	1926	II	CC7	ST7
Sample	ERS3737879	(SAMEA5949392)	2016-051842-014-01	Human	blood	2013-10-29	1927	II	CC7	ST7
Sample	ERS3737880	(SAMEA5949393)	2016-051842-034-01	Human	blood	2013-03-16	1942	II	CC7	ST7
Sample	ERS3737881	(SAMEA5949394)	2016-051842-035-01	Human	blood	2012-12-21	1957	II	CC7	ST7
Sample	ERS3737882	(SAMEA5949395)	2016-051842-036-01	Human	blood	2013-02-26	1927	II	CC7	ST7
Sample	ERS3737883	(SAMEA5949396)	2016-051842-038-01	Human	blood	2013-04-24	1948	II	CC7	ST7
Sample	ERS3737884	(SAMEA5949397)	2016-051842-042-01	Human	blood	2013-05-02	1931	II	CC7	ST7
Sample	ERS3737885	(SAMEA5949398)	2017-049591-005-01	Human	blood	2012-02-16	1927	II	CC7	ST7
Sample	ERS3737886	(SAMEA5949399)	2017-049591-011-01	Human	blood	2012-06-29	1951	II	CC7	ST7
Sample	ERS3737887	(SAMEA5949400)	2016-051842-037-01	Human	blood	2013-07-07	1923	II	CC7	ST7
Sample	ERS3737888	(SAMEA5949401)	2016-051842-043-01	Human	blood	2013-04-19	1936	II	CC7	ST7
Sample	ERS3737889	(SAMEA5949402)	2016-051842-066-01	Human	blood	2014-07-05	1931	II	CC7	ST7
Sample	ERS3737890	(SAMEA5949403)	2017-049591-004-01	Human	blood	2012-06-11	1943	II	CC7	ST7
Sample	ERS3737891	(SAMEA5949404)	2017-049591-001-01	Human	blood	2012-10-31	1941	II	CC7	ST7
Sample	ERS3737892	(SAMEA5949405)	2016-051842-003-01	Human	blood	2013-07-26	1928	II	CC7	ST7
Sample	ERS3737893	(SAMEA5949406)	2016-051842-040-01	Human	blood	2013-04-26	1942	II	CC7	ST7
Sample	ERS3737894	(SAMEA5949407)	2017-049591-009-01	Human	blood	2012-06-22	1928	II	CC7	ST7
Sample	ERS3737895	(SAMEA5949408)	2016-051842-121-01	Human	blood	2015-02-09	1935	II	CC7	ST7
Sample	ERS3737896	(SAMEA5949409)	2017-049591-010-01	Human	blood	2012-06-23	1949	II	CC7	ST7
Sample	ERS3737897	(SAMEA5949410)	2012-313959-002-01	Human	blood	2012-11-02	2012	II	CC7	ST7
Sample	ERS3737898	(SAMEA5949411)	2016-051842-102-01	Human	blood	2015-06-01	1927	II	CC7	ST7
Sample	ERS3737899	(SAMEA5949412)	2016-051842-113-01	Human	blood	2015-06-16	1973	II	CC7	ST7
Sample	ERS3737900	(SAMEA5949413)	2018-052228-001-01	Human	blood	2018-02-01	1928	II	CC7	ST7
Sample	ERS3737901	(SAMEA5949414)	2016-051842-022-01	Human	blood	2013-05-10	1938	II	CC89	ST391
Sample	ERS3737902	(SAMEA5949415)	2017-325981-007-01	Human	blood	2017-05-29	1927	II	CC121	ST121
Sample	ERS3737903	(SAMEA5949416)	2017-049591-012-01	Human	blood	2012-04-27	1964	II	CC121	ST121
Sample	ERS3737904	(SAMEA5949417)	2016-051842-092-01	Human	blood	2015-04-14	1958	II	CC121	ST121
Sample	ERS3737905	(SAMEA5949419)	2017-049591-071-01	Human	blood	2016-05-23	1933	II	CC121	ST121
Sample	ERS3737906	(SAMEA5949420)	2016-051842-055-01	Human	blood	2014-10-01	1949	II	CC121	ST121
Sample	ERS3737907	(SAMEA5949421)	2017-325981-015-01	Human	CSF	2017-06-14	1951	II	CC121	ST121
Sample	ERS3737908	(SAMEA5949422)	2016-051842-099-01	Human	blood	2015-06-18	1931	II	CC14	ST14
Sample	ERS3737909	(SAMEA5949423)	2017-049591-013-01	Human	blood	2012-07-26	1975	II	CC14	ST14
Sample	ERS3737910	(SAMEA5949424)	2016-051842-079-01	Human	blood	2014-03-25	1943	II	CC14	ST14
Sample	ERS3737911	(SAMEA5949425)	2017-049591-072-01	Human	blood	2016-05-30	2016	II	CC101	ST101
Sample	ERS3737912	(SAMEA5949426)	2018-070270-001-01	Human	blood	2018-02-24	1945	II	CC101	ST101
Sample	ERS3737913	(SAMEA5949427)	2016-051842-032-01	Human	blood	2013-04-26	1946	II	CC101	ST101
Sample	ERS3737914	(SAMEA5949428)	2016-051842-012-01	Human	blood	2013-11-20	1928	II	CC101	ST38
Sample	ERS3737915	(SAMEA5949429)	2016-051842-126-01	Human	blood	2015-01-08	1930	II	CC101	ST38
Sample	ERS3737916	(SAMEA5949430)	2012-313959-001-01	Human	blood	2011-10-24	2011	II	CC101	ST38
Sample	ERS3737917	(SAMEA5949431)	2016-051842-075-01	Human	blood	2014-05-07	1955	II	CC101	ST38
Sample	ERS3737918	(SAMEA5949432)	2016-051842-023-01	Human	blood	2013-07-22	1929	II	CC101	ST38
Sample	ERS4556543	(SAMEA6828920)	2018-401825-001-01	Human	blood	2018-06-06	1951	I	CC288	ST288
Sample	ERS4556544	(SAMEA6828921)	2018-401825-006-01	Human	blood	2018-08-08	1984	I	CC288	ST288
Sample	ERS4556545	(SAMEA6828922)	2017-049591-068-01	Human	blood	2016-05-04	1936	I	CC288	ST288
Sample	ERS4556546	(SAMEA6828923)	2018-373167-001-01	Human	CSF	2018-10-29	1944	I	CC224	ST224
Sample	ERS4556547	(SAMEA6828924)	2018-401825-013-01	Human	CSF	2018-11-19	1944	I	CC224	ST224
Sample	ERS4556548	(SAMEA6828925)	2017-049591-021-01	Human	blood	2015-08-05	1942	I	CC224	ST224
Sample	ERS4556549	(SAMEA6828926)	2018-401825-010-01	Human	blood	2018-07-25	1956	I	CC224	ST224
Sample	ERS4556550	(SAMEA6828927)	2018-250082-001-01	Human	blood	2018-08-17	1991	I	CC224	ST224
Sample	ERS4556551	(SAMEA6828928)	2017-353356-002-01	Human	blood	2017-12-02	1941	I	CC224	ST224
Sample	ERS4556552	(SAMEA6828929)	2017-325981-025-01	Human	blood	2017-06-30	-	I	CC224	ST224
Sample	ERS4556553	(SAMEA6828930)	2017-325981-006-01	Human	blood	2017-05-18	1941	I	ST429	ST429
Sample	ERS4556554	(SAMEA6828931)	2018-146296-002-01	Human	blood	2018-04-19	1946	I	ST429	ST429
Sample	ERS4556556	(SAMEA6828933)	2017-325981-020-01	Human	blood	2017-10-09	2009	I	CC87	ST87
Sample	ERS4556557	(SAMEA6828934)	2016-051842-110-01	Human	blood	2015-07-02	1946	I	CC5	ST5
Sample	ERS4556558	(SAMEA6828935)	2016-051842-123-01	Human	blood	2015-02-02	1938	I	CC5	ST5
Sample	ERS4556559	(SAMEA6828936)	2017-325981-024-01	Human	blood	2017-10-21	1955	I	CC5	ST5
Sample	ERS4556560	(SAMEA6828937)	2016-051842-002-01	Human	blood	2013-08-22	1991	I	CC5	ST5
Sample	ERS4556561	(SAMEA6828938)	2017-049591-047-01	Human	blood	2016-10-03	1940	I	CC3	ST3
Sample	ERS4556562	(SAMEA6828939)	2017-325981-004-01	Human	blood	2017-04-29	1939	I	CC3	ST3
Sample	ERS4556563	(SAMEA6828940)	2018-146296-005-01	Human	blood	2018-03-05	1937	I	CC3	ST3
Sample	ERS4556564	(SAMEA6828941)	2017-325981-016-01	Human	blood	2017-07-17	1946	I	CC3	ST3
Sample	ERS4556565	(SAMEA6828942)	2018-056765-001-01	Human	blood	2018-02-07	1946	I	CC3	ST3
Sample	ERS4556566	(SAMEA6828943)	2018-221796-001-01	Human	blood	2018-07-30	1926	I	CC3	ST3
Sample	ERS4556567	(SAMEA6828944)	2017-049591-050-01	Human	blood	2016-09-07	2016	I	CC3	ST3
Sample	ERS4556568	(SAMEA6828945)	2017-049591-052-01	Human	blood	2016-08-04	1953	I	CC3	ST3
Sample	ERS4556569	(SAMEA6828946)	2017-049591-049-01	Human	blood	2016-09-06	1939	I	CC3	ST3
Sample	ERS4556570	(SAMEA6828947)	2016-051842-044-01	Human	blood	2013-12-23	1947	I	CC3	ST3
Sample	ERS4556571	(SAMEA6828948)	2017-049591-065-01	Human	blood	2016-03-24	1932	I	CC3	ST3
Sample	ERS4556572	(SAMEA6828949)	2017-049591-023-01	Human	blood	2015-08-24	1940	I	CC3	ST3
Sample	ERS4556573	(SAMEA6828950)	2017-325981-023-01	Human	blood	2017-11-05	1969	I	CC3	ST3
Sample	ERS4556574	(SAMEA6828951)	2018-043213-001-01	Human	blood	2018-01-03	1943	I	CC3	ST3
Sample	ERS4556575	(SAMEA6828952)	2017-049591-041-01	Human	blood	2016-02-18	1934	I	CC3	ST3
Sample	ERS4556576	(SAMEA6828953)	2016-051842-030-01	Human	blood	2013-03-07	1954	I	CC3	ST3
Sample	ERS4556577	(SAMEA6828954)	2017-049591-003-01	Human	blood	2012-08-21	1957	I	CC3	ST3
Sample	ERS4556578	(SAMEA6828955)	2016-051842-006-01	Human	blood	2013-07-04	1927	I	CC3	ST3
Sample	ERS4556579	(SAMEA6828956)	2018-401825-003-01	Human	blood	2018-06-28	1943	I	CC3	ST3
Sample	ERS4556580	(SAMEA6828957)	2016-051842-054-01	Human	blood	2014-12-11	1935	I	CC4	ST219
Sample	ERS4556581	(SAMEA6828958)	2017-340174-001-01	Human	blood	2017-01-12	1929	I	CC4	ST219
Sample	ERS4556582	(SAMEA6828959)	2016-051842-041-01	Human	CSF	2013-01-03	1936	I	CC4	ST4
Sample	ERS4556583	(SAMEA6828960)	2016-051842-027-01	Human	CSF	2013-07-16	1944	I	CC1	ST1
Sample	ERS4556584	(SAMEA6828961)	2016-051842-133-01	Human	CSF	2015-01-14	1988	I	CC1	ST1
Sample	ERS4556585	(SAMEA6828962)	2018-401825-007-01	Human	blood	2018-08-16	1973	I	CC1	ST1
Sample	ERS4556586	(SAMEA6828963)	2016-051842-001-01	Human	blood	2013-09-06	1929	I	CC1	ST1
Sample	ERS4556587	(SAMEA6828964)	2018-377725-001-01	Human	blood	2018-10-24	2018	I	CC1	ST1
Sample	ERS4556588	(SAMEA6828965)	2018-212251-001-01	Human	blood	2018-07-18	1950	II	CC155	ST155
Sample	ERS4556589	(SAMEA6828966)	2018-031127-001-01	Human	blood	2018-07-20	1930	I	CC1	ST1
Sample	ERS4556590	(SAMEA6828967)	2018-401825-004-01	Human	blood	2018-07-05	1930	I	CC1	ST1
Sample	ERS4556591	(SAMEA6828968)	2016-051842-071-01	Human	CSF	2014-01-08	1948	I	CC1	ST1
Sample	ERS4556592	(SAMEA6828969)	2016-051842-019-01	Human	blood	2013-06-13	1933	I	CC1	ST1
Sample	ERS4556593	(SAMEA6828970)	2016-051842-025-01	Human	blood	2013-06-13	1923	I	CC1	ST1
Sample	ERS4556594	(SAMEA6828971)	2016-051842-026-01	Human	blood	2013-06-13	1939	I	CC1	ST1
Sample	ERS4556595	(SAMEA6828972)	2017-049591-074-01	Human	blood	2016-06-20	-	I	CC1	ST1
Sample	ERS4556596	(SAMEA6828973)	2016-051842-020-01	Human	blood	2013-05-28	1958	I	CC1	ST1
Sample	ERS4556597	(SAMEA6828974)	2016-051842-028-01	Human	blood	2013-01-09	1965	I	CC1	ST1
Sample	ERS4556598	(SAMEA6828975)	2016-051842-008-01	Human	blood	2013-10-02	1929	I	CC1	ST1
Sample	ERS4556599	(SAMEA6828976)	2016-051842-009-01	Human	blood	2013-11-26	1928	I	CC1	ST1
Sample	ERS4556600	(SAMEA6828977)	2016-051842-010-01	Human	blood	2013-09-06	1933	I	CC1	ST1
Sample	ERS4556601	(SAMEA6828978)	2016-051842-031-01	Human	CSF	2013-04-03	1941	I	CC1	ST1
Sample	ERS4556602	(SAMEA6828979)	2016-051842-045-01	Human	blood	2014-12-18	1929	I	CC1	ST1
Sample	ERS4556603	(SAMEA6828980)	2016-051842-094-01	Human	blood	2015-04-14	1930	I	CC1	ST1
Sample	ERS4556604	(SAMEA6828981)	2016-051842-107-01	Human	blood	2015-05-19	1962	I	CC1	ST1
Sample	ERS4556605	(SAMEA6828982)	2017-049591-019-01	Human	blood	2015-08-05	2015	I	CC1	ST1
Sample	ERS4556606	(SAMEA6828983)	2017-325981-010-01	Human	blood	2017-06-06	1963	I	CC1	ST1
Sample	ERS4556607	(SAMEA6828984)	2016-051842-116-01	Human	blood	2015-03-30	2015	I	CC1	ST1
Sample	ERS4556608	(SAMEA6828985)	2016-051842-117-01	Human	blood	2015-03-30	2015	I	CC1	ST1
Sample	ERS4556609	(SAMEA6828986)	2017-049591-007-01	Human	blood	2012-06-27	1928	I	CC1	ST1
Sample	ERS4556610	(SAMEA6828987)	2018-056765-003-01	Human	blood	2018-02-19	1963	I	CC1	ST1
Sample	ERS4556611	(SAMEA6828988)	2018-056765-002-01	Human	blood	2018-02-17	1963	I	CC1	ST1
Sample	ERS4556612	(SAMEA6828989)	2016-051842-130-01	Human	blood	2015-01-14	1960	I	CC1	ST1
Sample	ERS4556613	(SAMEA6828990)	2018-147187-001-01	Human	blood	2018-05-07	1957	I	CC1	ST1
Sample	ERS4556614	(SAMEA6828991)	2018-401825-009-01	Human	blood	2018-07-26	1957	I	CC1	ST1
Sample	ERS4556615	(SAMEA6828992)	2017-325981-011-01	Human	blood	2017-07-08	1937	I	CC1	ST1
Sample	ERS4556616	(SAMEA6828993)	2018-401825-005-01	Human	blood	2018-08-09	1932	I	CC1	ST1
Sample	ERS4556617	(SAMEA6828994)	2016-051842-018-01	Human	blood	2013-09-06	1924	I	CC1	ST1
Sample	ERS4556618	(SAMEA6828995)	2016-051842-132-01	Human	CSF	2015-01-14	1982	I	CC1	ST1
Sample	ERS4556619	(SAMEA6828996)	2017-325981-012-01	Human	blood	2017-07-23	1923	I	CC1	ST1
Sample	ERS4556620	(SAMEA6828997)	2017-049591-066-01	Human	blood	2016-03-30	1961	I	CC1	ST1
Sample	ERS4556621	(SAMEA6828998)	2018-401825-011-01	Human	blood	2018-09-03	1976	I	CC1	ST1
Sample	ERS4556622	(SAMEA6828999)	2016-051842-088-01	Human	blood	2015-10-29	1985	I	CC1	ST1
Sample	ERS4556623	(SAMEA6829000)	2016-051842-089-01	Human	blood	2015-10-29	2015	I	CC1	ST1
Sample	ERS4556624	(SAMEA6829001)	2017-049591-038-01	Human	blood	2016-01-13	1993	I	CC1	ST1
Sample	ERS4556625	(SAMEA6829002)	2016-051842-050-01	Human	blood	2014-08-11	1933	I	CC1	ST1
Sample	ERS4556626	(SAMEA6829003)	2016-051842-056-01	Human	CSF	2014-10-01	1935	I	CC1	ST1
Sample	ERS4556627	(SAMEA6829004)	2016-051842-090-01	Human	blood	2015-10-31	1947	I	CC1	ST1
Sample	ERS4556628	(SAMEA6829005)	2016-051842-091-01	Human	blood	2015-03-24	1940	I	CC1	ST1
Sample	ERS4556629	(SAMEA6829006)	2016-051842-097-01	Human	blood	2015-07-02	2015	I	CC1	ST1
Sample	ERS4556630	(SAMEA6829007)	2016-051842-105-01	Human	blood	2015-07-15	1925	I	CC1	ST1
Sample	ERS4556631	(SAMEA6829008)	2016-051842-108-01	Human	blood	2015-06-16	1981	I	CC1	ST1
Sample	ERS4556632	(SAMEA6829009)	2016-051842-111-01	Human	blood	2015-07-02	1972	I	CC1	ST1
Sample	ERS4556633	(SAMEA6829010)	2016-051842-124-01	Human	blood	2015-03-03	1934	I	CC1	ST1
Sample	ERS4556634	(SAMEA6829011)	2016-051842-128-01	Human	blood	2015-01-14	1934	I	CC1	ST1
Sample	ERS4556635	(SAMEA6829012)	2017-049591-027-01	Human	blood	2015-09-28	1982	I	CC1	ST1
Sample	ERS4556636	(SAMEA6829013)	2017-049591-030-01	Human	blood	2015-10-26	1959	I	CC1	ST1
Sample	ERS4556637	(SAMEA6829014)	2017-049591-032-01	Human	blood	2015-12-01	1963	I	CC1	ST1
Sample	ERS4556638	(SAMEA6829015)	2017-049591-039-01	Human	blood	2016-02-02	1983	I	CC1	ST1
Sample	ERS4556639	(SAMEA6829016)	2017-049591-040-01	Human	blood	2016-02-02	2015	I	CC1	ST1
Sample	ERS4556640	(SAMEA6829017)	2016-051842-048-01	Human	blood	2014-08-11	1947	I	CC1	ST1
Sample	ERS4556641	(SAMEA6829018)	2016-051842-051-01	Human	CSF	2014-11-19	1928	I	CC1	ST1
Sample	ERS4556642	(SAMEA6829019)	2016-051842-127-01	Human	blood	2015-01-14	1929	I	CC1	ST1
Sample	ERS4556643	(SAMEA6829020)	2017-049591-020-01	Human	blood	2015-08-05	1938	I	CC1	ST1
Sample	ERS4556644	(SAMEA6829021)	2017-049591-024-01	Human	blood	2015-08-31	1979	I	CC1	ST1
Sample	ERS4556645	(SAMEA6829022)	2017-049591-034-01	Human	blood	2015-12-01	1959	I	CC1	ST1
Sample	ERS4556646	(SAMEA6829023)	2017-049591-054-01	Human	blood	2016-08-02	1974	I	CC1	ST1
Sample	ERS4556647	(SAMEA6829024)	2017-049591-033-01	Human	blood	2015-12-01	1926	I	CC1	ST1
Sample	ERS4556649	(SAMEA6829026)	2017-049591-073-01	Human	blood	2016-06-20	1924	I	CC1	ST1
Sample	ERS4556650	(SAMEA6829027)	2016-298830-001-01	Human	blood	2016-10-26	1937	I	CC1	ST1
Sample	ERS4556651	(SAMEA6829028)	2016-051842-004-01	Human	blood	2013-08-01	1943	I	CC1	ST1
Sample	ERS4556652	(SAMEA6829029)	2017-325981-017-01	Human	blood	2017-09-19	1926	I	CC1	ST1
Sample	ERS4556653	(SAMEA6829030)	2016-051842-024-01	Human	blood	2013-06-13	1920	I	CC1	ST1
Sample	ERS4556654	(SAMEA6829031)	2017-049591-053-01	Human	blood	2016-07-24	1939	I	CC218	ST218
Sample	ERS4556655	(SAMEA6829032)	2018-283150-001-01	Human	blood	2018-09-22	1936	I	CC6	ST6
Sample	ERS4556656	(SAMEA6829033)	2018-346503-001-01	Human	blood	2018-10-29	1944	I	CC6	ST6
Sample	ERS4556657	(SAMEA6829034)	2018-375994-001-01	Human	blood	2018-11-21	1976	I	CC6	ST6	Epidemiologically linked to retailer A
Sample	ERS4556658	(SAMEA6829035)	2018-377725-003-01	Human	blood	2018-10-27	1935	I	CC6	ST6
Sample	ERS4556659	(SAMEA6829036)	2016-051842-077-01	Human	blood	2014-05-26	1928	I	CC6	ST6
Sample	ERS4556660	(SAMEA6829037)	2018-346503-002-01	Human	CSF	2018-10-22	1936	I	CC6	ST6
Sample	ERS4556661	(SAMEA6829038)	2018-377725-002-01	Human	blood	2018-10-17	1932	I	CC6	ST6	Epidemiologically linked to retailer B
Sample	ERS4556662	(SAMEA6829039)	2016-051842-016-01	Human	blood	2013-11-26	1934	I	CC6	ST6
Sample	ERS4556663	(SAMEA6829040)	2017-049591-046-01	Human	blood	2016-03-24	1938	I	CC6	ST6
Sample	ERS4556664	(SAMEA6829041)	2017-049591-070-01	Human	blood	2016-05-25	1932	I	CC6	ST6
Sample	ERS4556665	(SAMEA6829042)	2018-146296-008-01	Human	blood	2018-02-12	1947	I	CC6	ST6
Sample	ERS4556666	(SAMEA6829043)	2016-051842-053-01	Human	blood	2014-11-17	1931	I	CC2	ST2
Sample	ERS4556667	(SAMEA6829044)	2016-051842-083-01	Human	blood	2014-02-06	1924	I	CC2	ST2
Sample	ERS4556668	(SAMEA6829045)	2018-348836-001-01	Human	blood	2018-11-03	1944	I	CC2	ST2
Sample	ERS4556669	(SAMEA6829046)	2017-049591-051-01	Human	blood	2016-09-01	1932	I	CC2	ST2
Sample	ERS4556670	(SAMEA6829047)	2017-325981-009-01	Human	blood	2017-07-01	1962	I	CC2	ST2
Sample	ERS4556671	(SAMEA6829048)	2017-049591-056-01	Human	blood	2016-07-24	1940	I	CC2	ST2
Sample	ERS4556672	(SAMEA6829049)	2017-049591-057-01	Human	blood	2016-06-26	1949	I	CC2	ST2
Sample	ERS4556673	(SAMEA6829050)	2017-325981-005-01	Human	blood	2017-05-21	1950	I	CC2	ST2
Sample	ERS4556674	(SAMEA6829051)	2017-156934-002-01	Human	blood	2017-05-23	1946	I	CC2	ST2
Sample	ERS4556675	(SAMEA6829052)	2017-325981-008-01	Human	blood	2017-06-13	1938	I	CC2	ST2
Sample	ERS4556676	(SAMEA6829053)	2018-401825-008-01	Human	blood	2018-08-16	1937	I	CC2	ST2
Sample	ERS4556677	(SAMEA6829054)	2018-146296-006-01	Human	blood	2018-04-08	1978	I	CC2	ST2
Sample	ERS4556678	(SAMEA6829055)	2018-146296-007-01	Human	blood	2018-04-04	1931	I	CC2	ST2
Sample	ERS4556679	(SAMEA6829056)	2017-049591-058-01	Human	blood	2016-07-04	1946	I	CC2	ST2
	ERS4556680	(SAMEA6829057)	2016-051842-098-01	Human	blood	2015-02-02	1928	II	CC9	ST9
	ERS4556681	(SAMEA6829058)	2017-049591-017-01	Human	CSF	2015-07-28	1947	II	CC9	ST9
	ERS4556682	(SAMEA6829059)	2016-051842-049-01	Human	blood	2014-11-19	1915	II	CC9	ST9
	ERS4819835	(SAMEA7059216)	2018-327276-002-01	Environmental swab	cured meat slicer	2018-10-30	-	I	CC6	ST6	retailer B
	ERS4819836	(SAMEA7059217)	2018-327276-004-01	Environmental swab	working surface	2018-10-30	-	I	CC6	ST6	retailer B
	ERS4819837	(SAMEA7059218)	2018-389561-016-01	Environmental swab	cured meat slicer	2018-12-12	-	I	CC6	ST6	retailer A
	ERS4819838	(SAMEA7059219)	2018-389561-019-01	Environmental swab	sausage knife	2018-12-12	-	I	CC6	ST6	retailer A
